# Supplementary material
Source: PubMed Central journal article supplement (PMC2951203)
Supplement: supp_M110.160382_jbc.M110.160382-1.pdf [file supp_M110.160382_jbc.M110.160382-1.pdf]

xASIC1.1-M85C

A pH 7.6 x 10 s

B

pH 7.6 x 5 s

pH 5.5

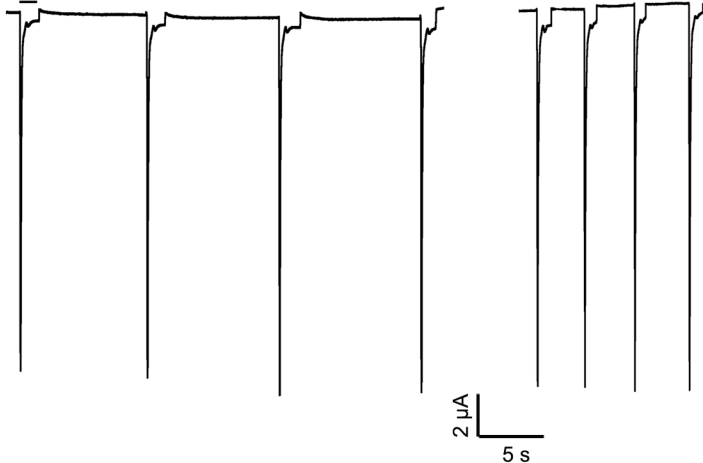

Recovery time from desensitization. A) Four consecutive activations of xASIC1.1-M585C with pH 5.5. Between stimuli pH 7.6 was applied for 10 s to recover channels from desensitization. B) Same protocol but recovery was shortened to 5 s.
